# Supplementary material for: Controlling sulphur precursor addition for large single crystal domains of WS2
Source: Royal Society of Chemistry journal article supplement (doi:10.1039/c4nr04091k), 2014-09-08
Supplement: c4nr04091k1.pdf [file c4nr04091k1.pdf]

## Supplementary Information

In Fig. S1b, it is evident that the PL intensity of a bi-layer WS<sub>2</sub> is already quenched significantly with regard to the monolayer. Apart from the enhanced intensity at the A<sub>1g</sub> peak, the bi-layer WS<sub>2</sub> has characteristic E<sub>2g</sub><sup>1</sup>/A<sub>1g</sub> peak difference slightly greater than monolayer WS<sub>2</sub> as demonstrated in Fig. S1c, which agrees proportionally with Ref 17.

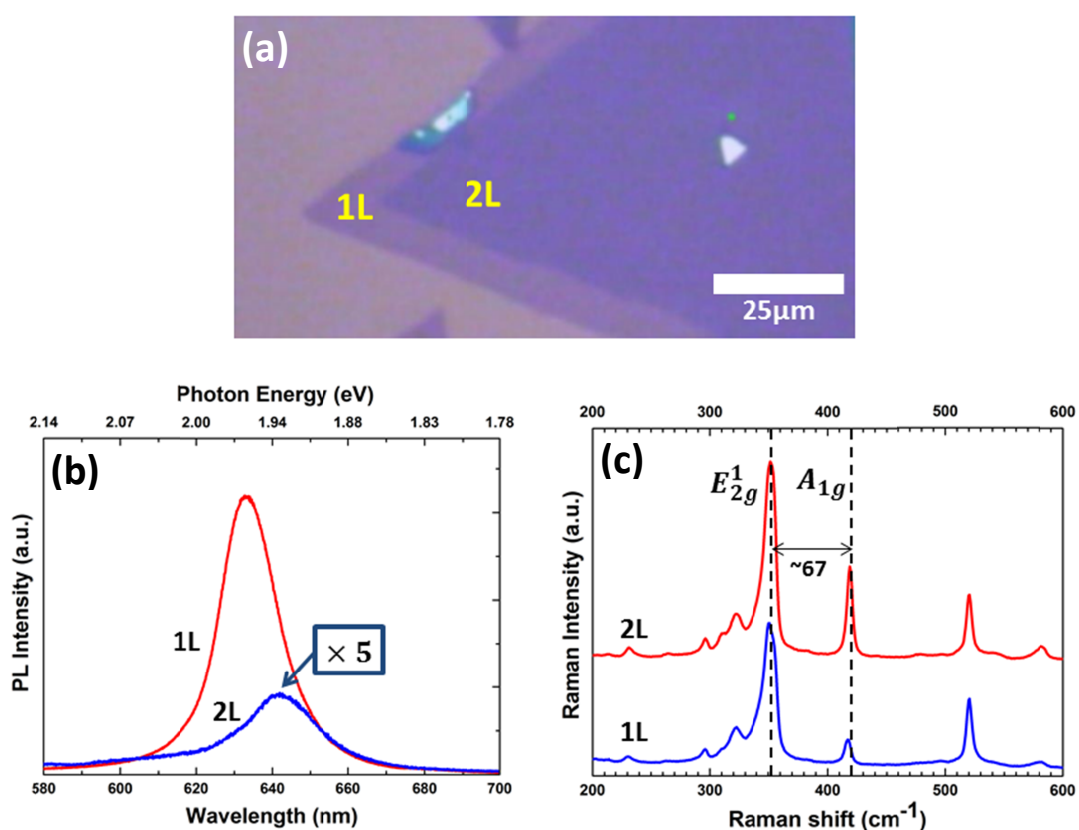

**Fig. S1** PL and Raman characterization of WS<sub>2</sub> monolayer (1L) and bi-layer (2L) domains. (a) Optical image of the as-examined WS<sub>2</sub> domain. (b and c) Characteristic PL and Raman profiles of the corresponding 1L and 2L WS<sub>2</sub> domains indicated in (a).

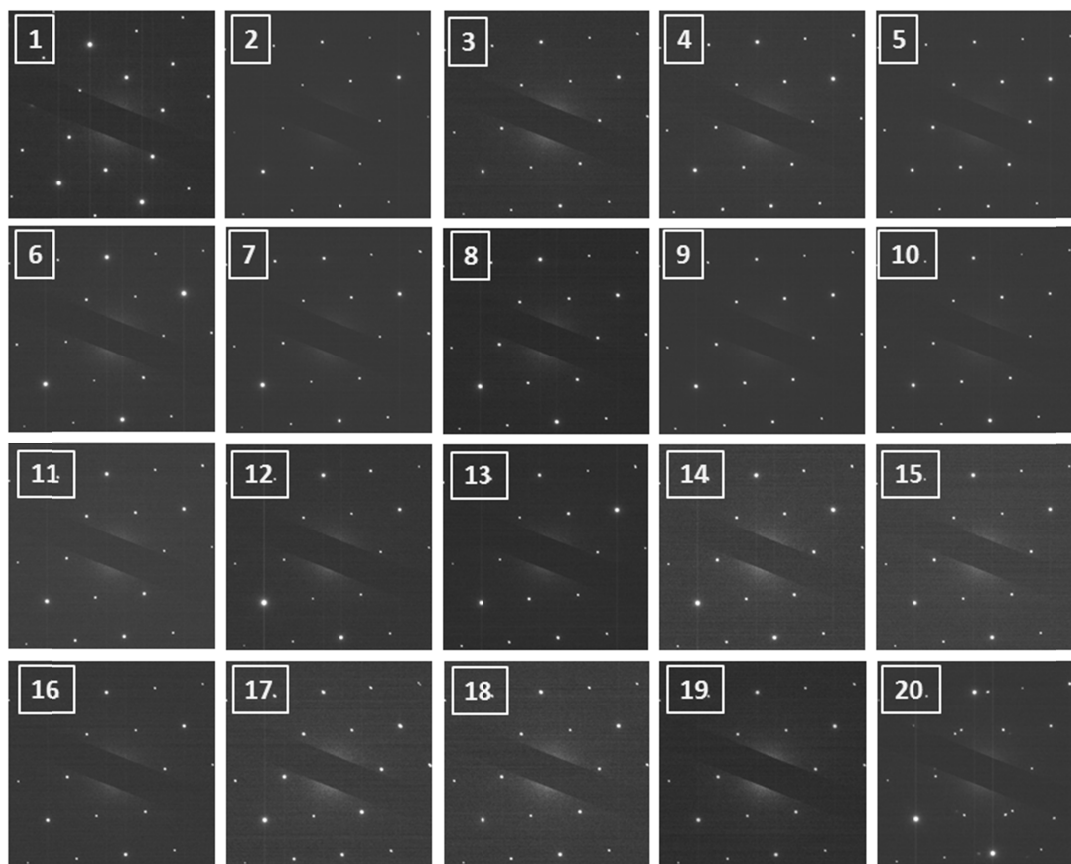

**Fig. S2** Full exhibition of SAED patterns of the as-produced WS<sub>2</sub> domain taken from 20 consecutive SiN TEM holes highlighted in Fig.5 (main text).
